# Supplementary material for: Investigation of the Effect of Substituents on Electronic and Charge Transport Properties of Benzothiazole Derivatives
Source: MDPI journal article supplement (doi:10.3390/molecules27248672), 2022-12-08
Supplement: s1 [file s1]

## Supporting information

# Investigation of the Effect of Substituents on Electronic and Charge Transport Properties of Benzothiazole Derivatives

Ahmad Irfan <sup>1,2,\*</sup>, Abul Kalam <sup>1</sup>, Abdullah G. Al-Sehemi <sup>1</sup> and Mrigendra Dubey <sup>3</sup>

<sup>1</sup> Department of Chemistry, College of Science, King Khalid University, P.O. Box 9004, Abha 61413, Saudi Arabia

<sup>2</sup> Research Center for Advanced Materials Science, College of Science, King Khalid University, P.O. Box 9004, Abha 61413, Saudi Arabia

<sup>3</sup> Soft Materials Research Laboratory, Discipline of Metallurgy Engineering and Materials Science, Indian Institute of Technology Indore, Indore 453552, India

\* Correspondence: irfaahmad@gmail.com; Tel.: +00-9661-7241-9481; Fax: +00-9661-7241-8426

## 1. Synthesis of Comp1:

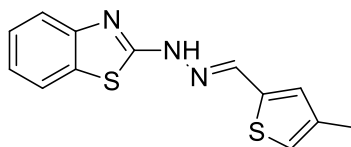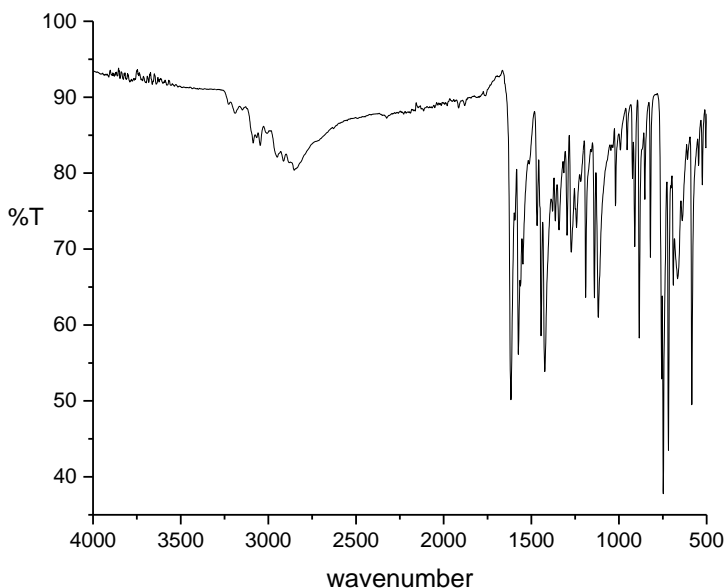

**Figure S1.** FTIR spectrum of ligand of **Comp1**.

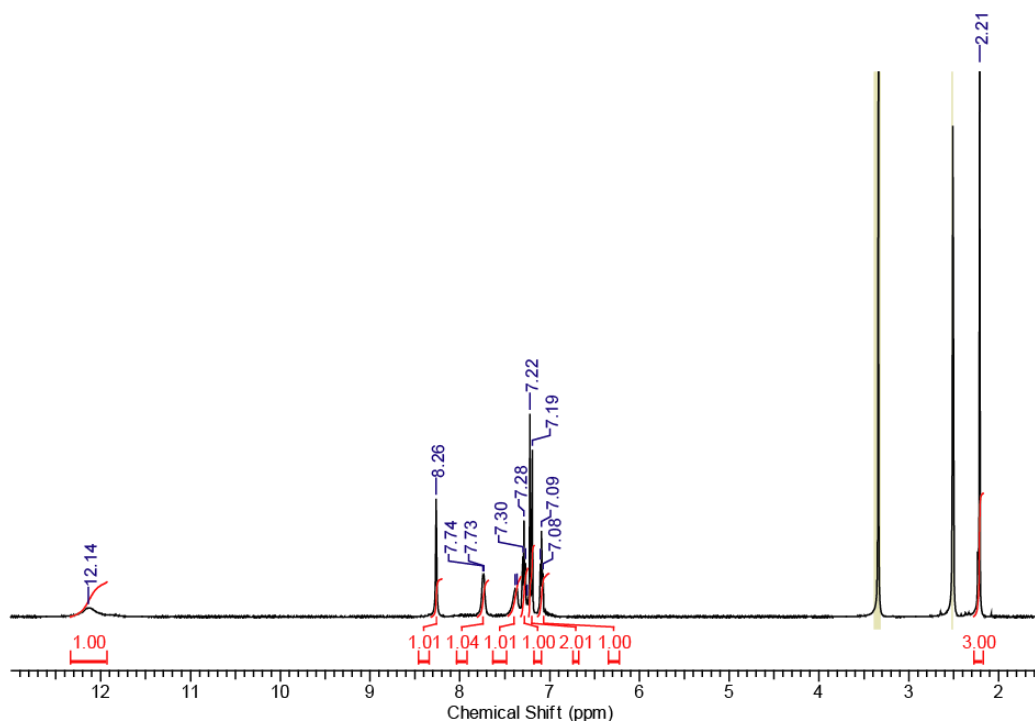

**Figure S2.**  $^1\text{H}$  NMR spectrum of **Comp1**.

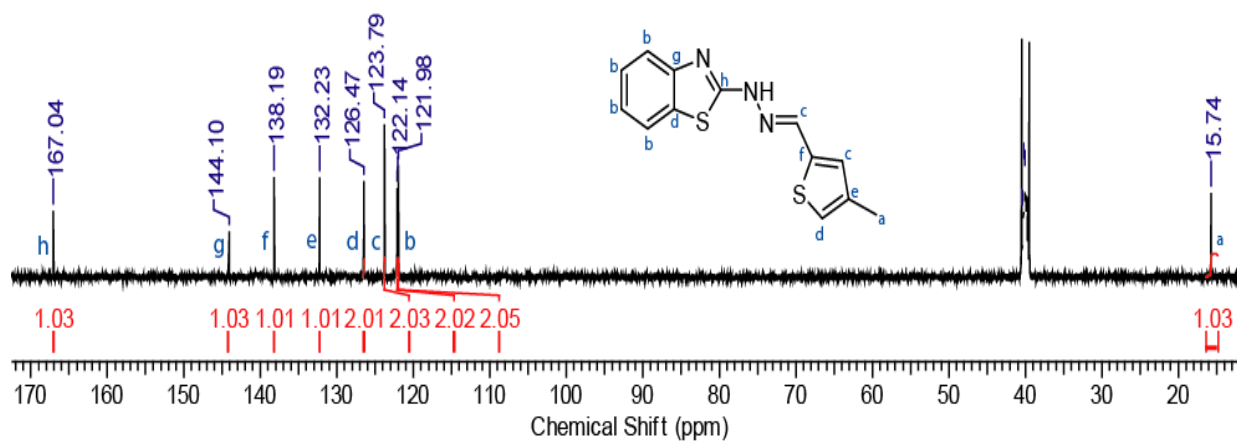

**Figure S3.**  $^{13}\text{C}$  NMR spectra of **Comp1**.

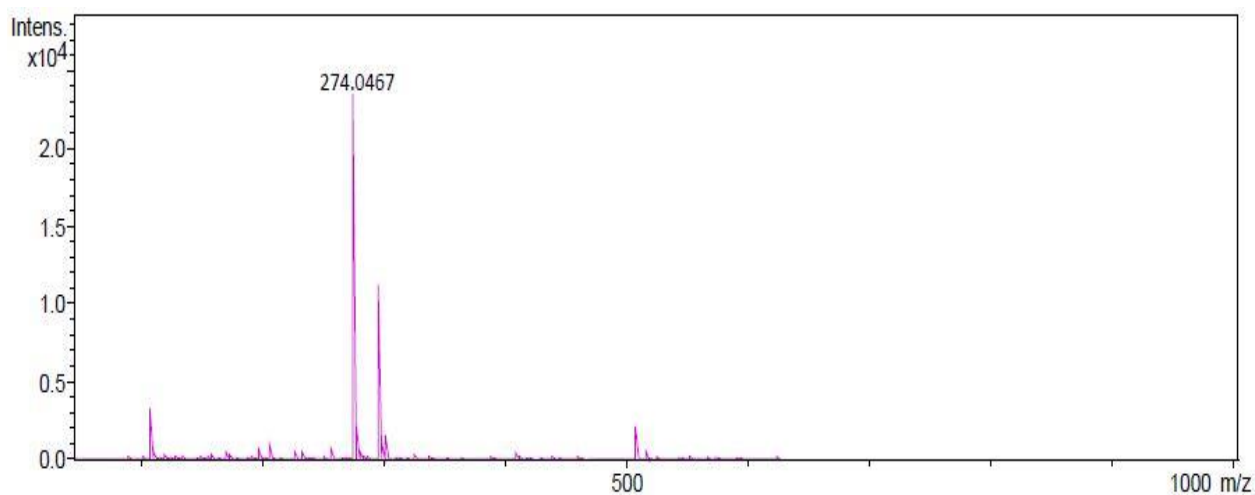

**Figure S4.** HR-MS spectra of **Comp1**.

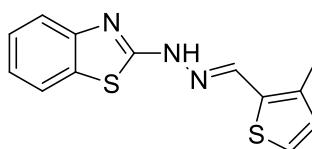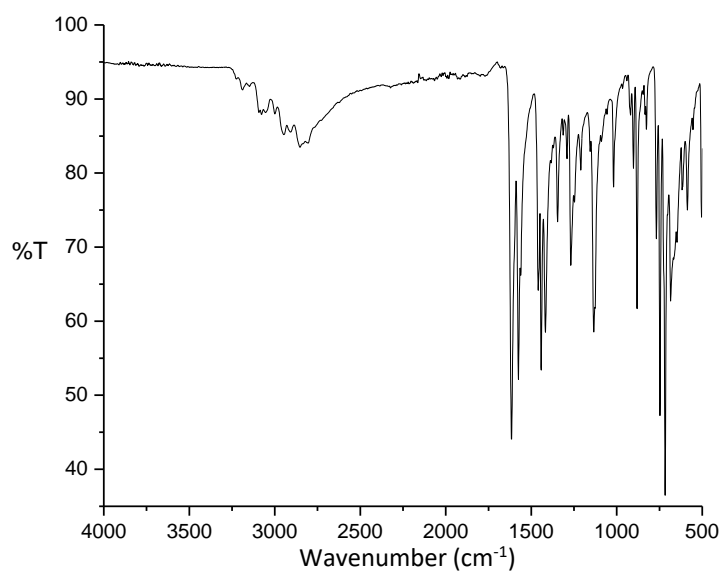

**Figure S5.** FTIR spectrum of ligand of **Comp2**.

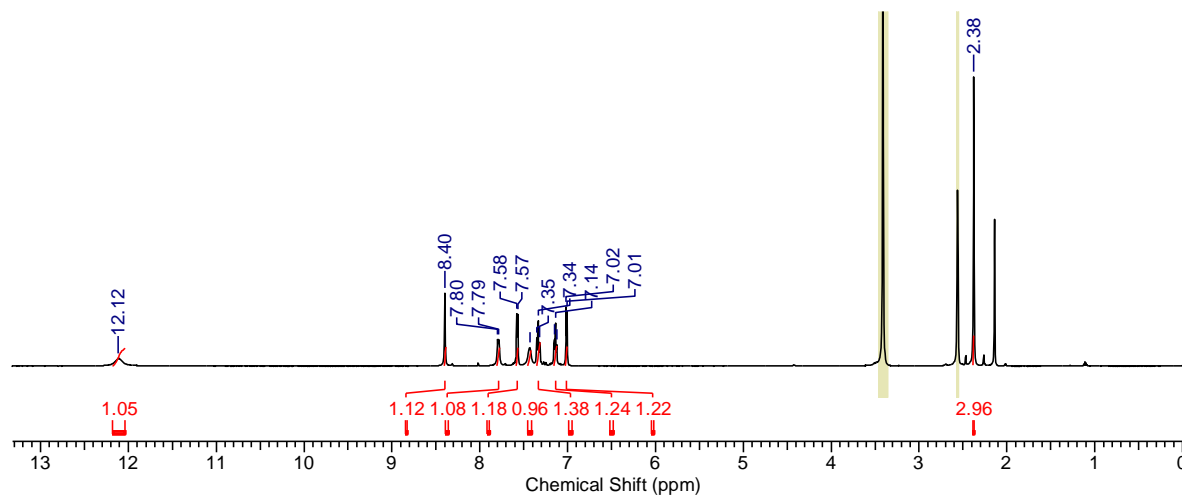

**Figure S6.**  $^1\text{H}$  NMR spectrum of **Comp2**.

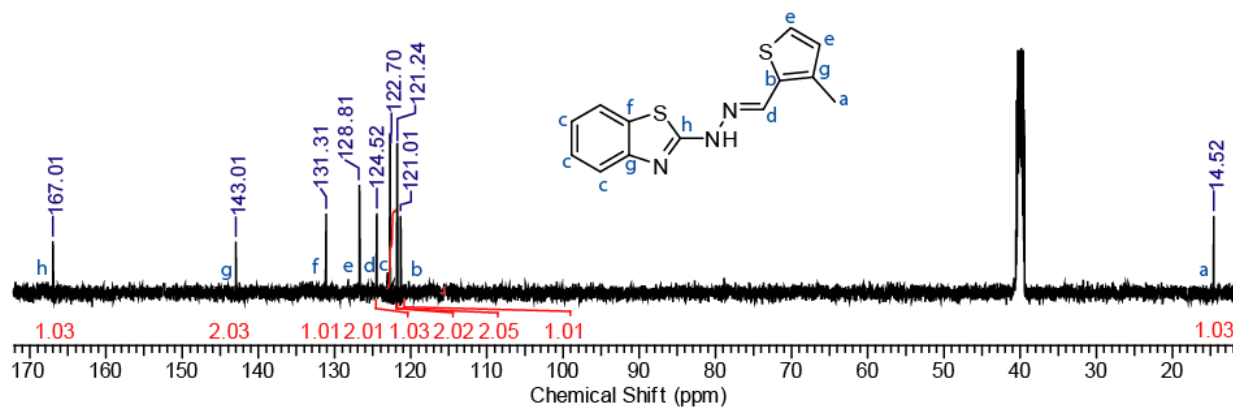

**Figure S7.**  $^{13}\text{C}$  NMR spectra of **Comp2**.

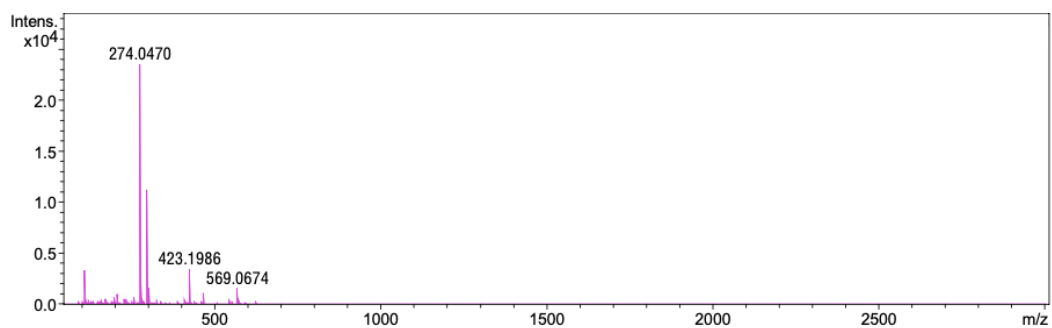

**Figure S8.** HR-MS spectra of **Comp2**.

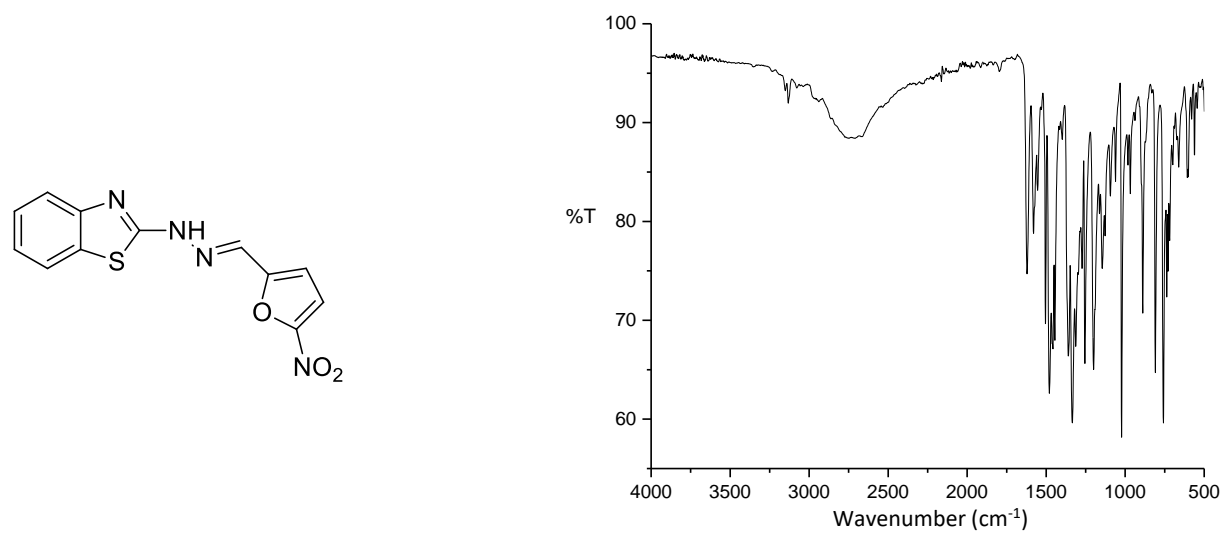

**Figure S9.** FTIR spectrum of **Comp3**.

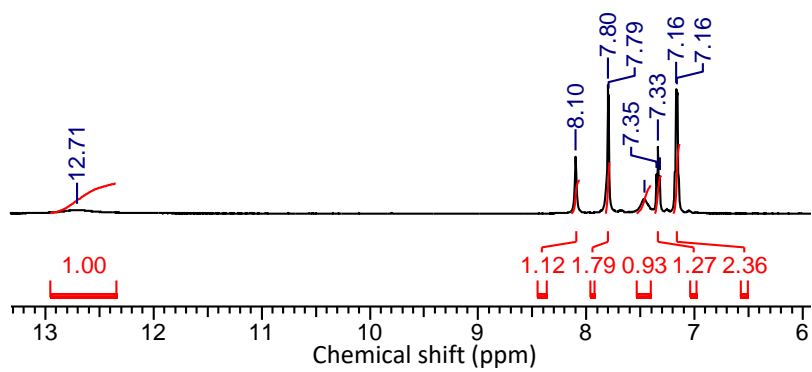

**Figure S10.** <sup>1</sup>H NMR spectrum of **Comp3**.

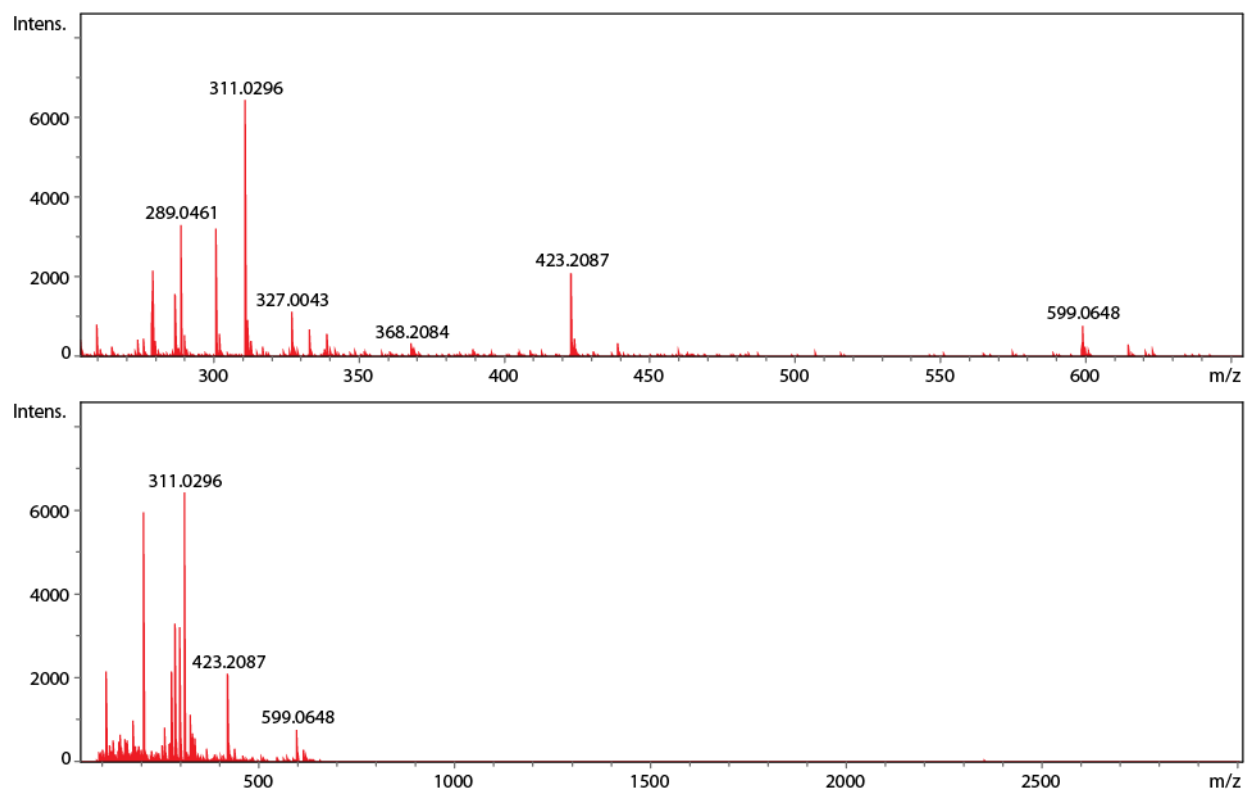

**Figure S11.** (Lower) Full HR-MS spectrum and (upper) selected HR-MS spectrum of **Comp3**.

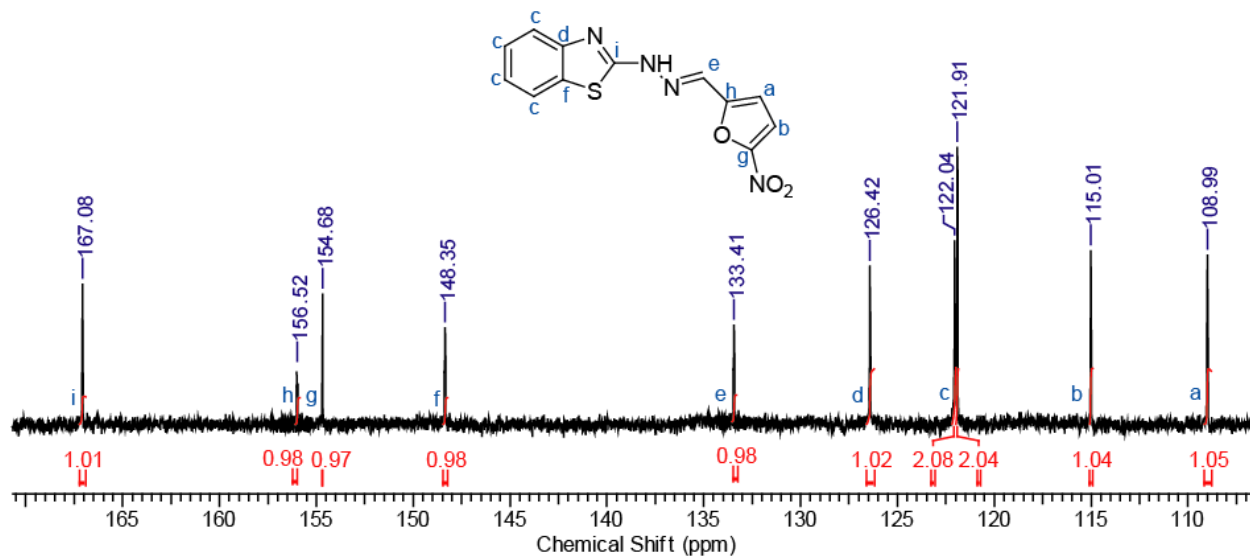

**Figure S12.**  $^{13}\text{C}$  NMR spectra of **Comp3**.

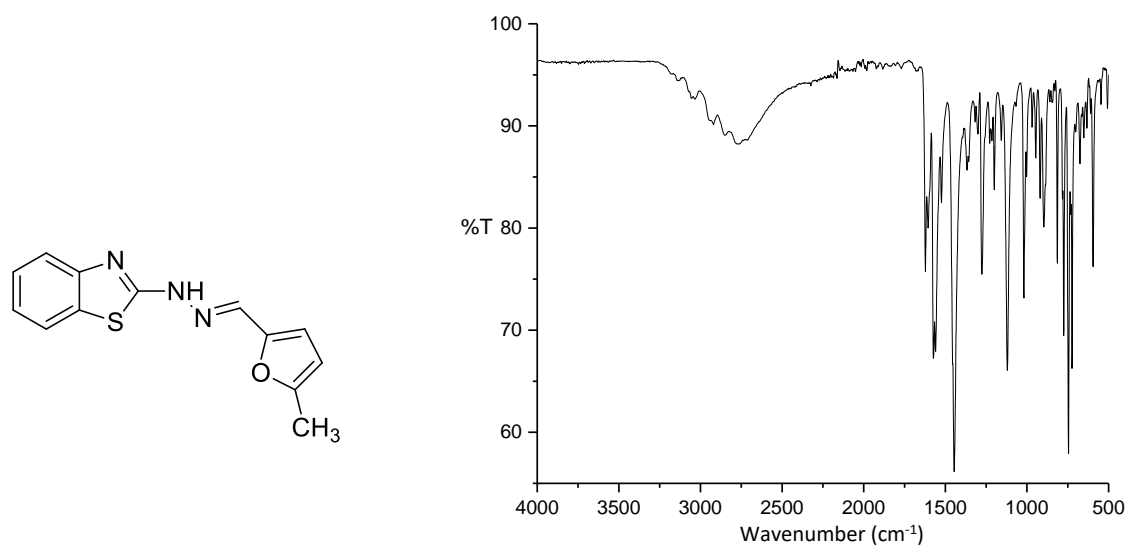

**Figure S13.** FTIR spectrum of **Comp4**.

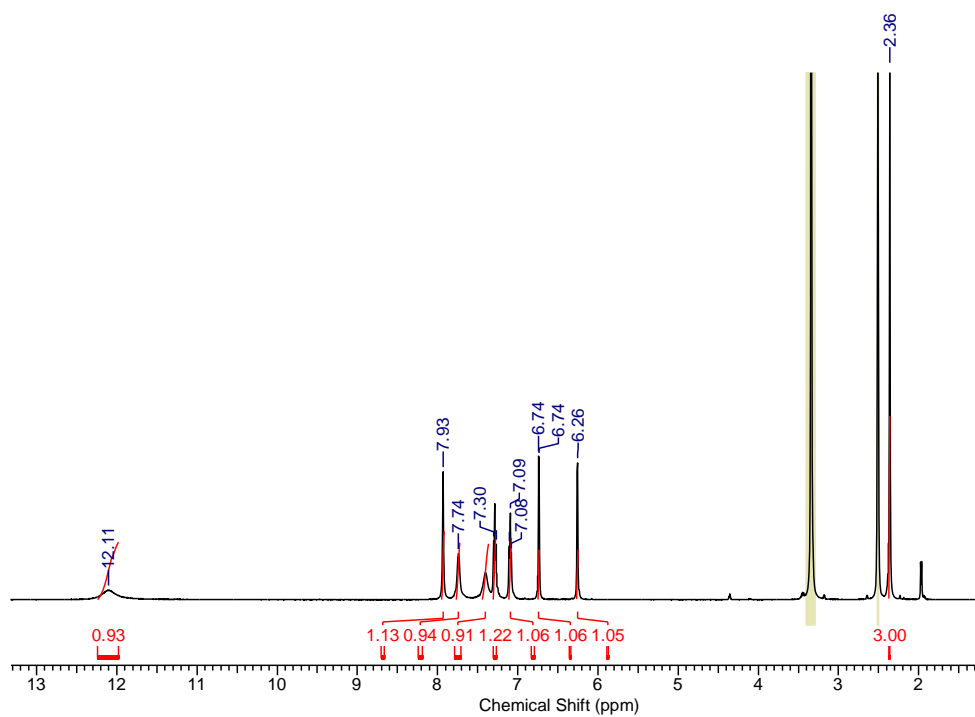

**Figure S14.** <sup>1</sup>H NMR spectrum of **Comp4**.

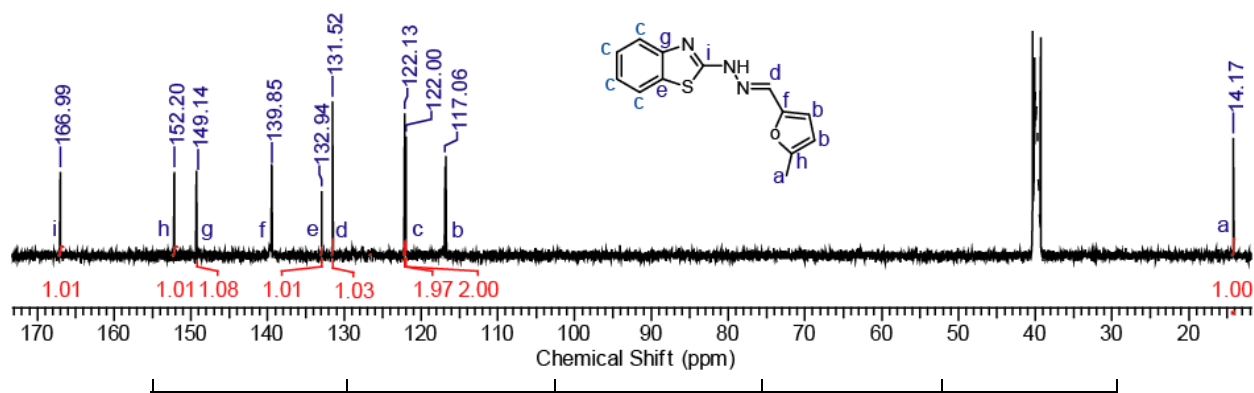

**Figure S15.**  $^{13}\text{C}$  NMR spectra of **Comp4**.

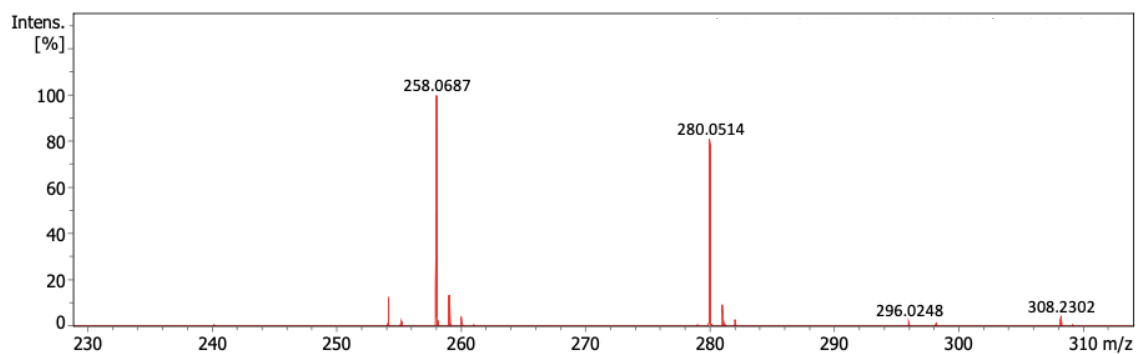

**Figure S16.** HR-MS spectrum of **Comp4**.

**Table S1.**  $\lambda_{\text{max}}$  for all the four compounds in acetone, ethanol, DMF and DMSO.

| Compounds    | Acetone                     | Ethanol                     | DMF                         | DMSO                        |
|--------------|-----------------------------|-----------------------------|-----------------------------|-----------------------------|
|              | $\lambda_{\text{max}}$ (nm) | $\lambda_{\text{max}}$ (nm) | $\lambda_{\text{max}}$ (nm) | $\lambda_{\text{max}}$ (nm) |
| <b>Comp1</b> | 353                         | Insoluble                   | 360                         | 362                         |
| <b>Comp2</b> | 353                         | 352                         | 358                         | 361                         |
| <b>Comp3</b> | Insoluble                   | Insoluble                   | 430                         | 445                         |
| <b>Comp4</b> | 343                         | 344                         | 350                         | 353                         |



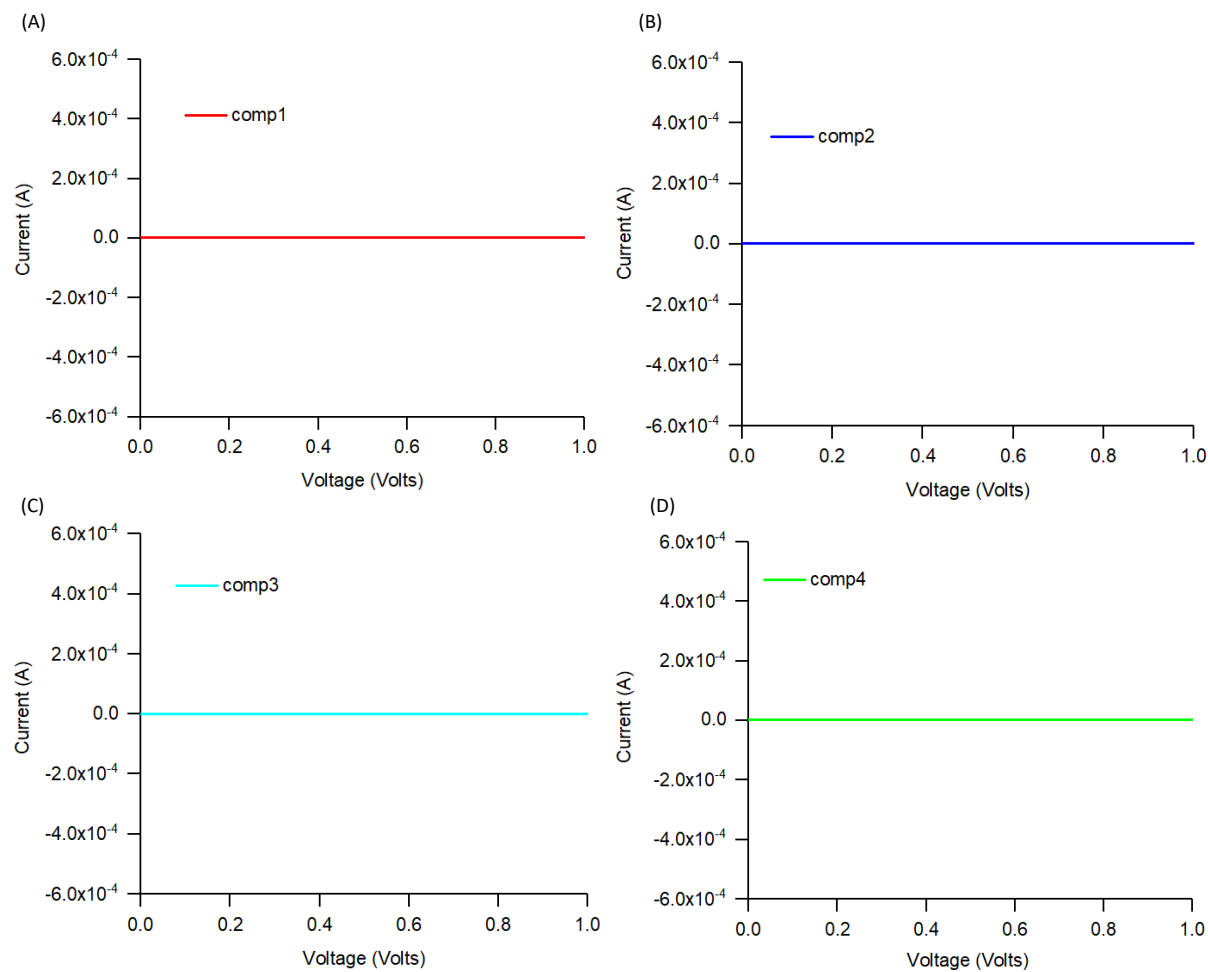

**Figure S17.** I-V characteristics of (A) **Comp1**-film, (B) **Comp2**-film, (C) **Comp3**-film and (D) **Comp4**-film.
